# Supplementary material for: Chromosomal Damage, Chromosome Instability, and Polymorphisms in GSTP1 and XRCC1 as Biomarkers of Effect and Susceptibility in Farmers Exposed to Pesticides
Source: MDPI journal article supplement (doi:10.3390/ijms25084167), 2024-04-10
Supplement: s1 [file s1]

## Supplementary Material

**Table S1.** Detailed characteristics of the groups studied

| E             | Age<br>(y) | Exposure<br>(m) | Habits |    | UE            | Age<br>(y) | Exposure<br>(m) | Habits |    |
|---------------|------------|-----------------|--------|----|---------------|------------|-----------------|--------|----|
|               |            |                 | S      | D  |               |            |                 | S      | D  |
| 1             | 48         | 24              | NS     | SP | 1             | 47         | -               | NS     | SP |
| 2             | 40         | 24              | NS     | SP | 2             | 41         | -               | NS     | W  |
| 3             | 70         | 780             | NS     | W  | 3             | 68         | -               | NS     | SP |
| 4             | 30         | 108             | NS     | SP | 4             | 29         | -               | NS     | ND |
| 5             | 22         | 60              | NS     | SP | 5             | 22         | -               | NS     | SP |
| 6             | 24         | 36              | NS     | W  | 6             | 24         | -               | NS     | SP |
| 7             | 19         | 50              | NS     | SP | 7             | 19         | -               | NS     | SP |
| 8             | 60         | 384             | NS     | SP | 8             | 60         | -               | NS     | SP |
| 9             | 26         | 96              | NS     | SP | 9             | 24         | -               | NS     | SP |
| 10            | 53         | 240             | NS     | ND | 10            | 54         | -               | NS     | SP |
| <b>Mean</b>   | 39.20      | 180.2           |        |    | <b>Mean</b>   | 39.00      |                 |        |    |
| <b>Median</b> | 35.00      | 78.00           |        |    | <b>Median</b> | 35.00      |                 |        |    |
| <b>SD</b>     | 17.78      | 239.9           |        |    | <b>SD</b>     | 17.44      |                 |        |    |

**Abbreviations:** E, Exposed; UE, unexposed; S, Smoking; NS, Non-smoker; D, Drinking; ND, Non-drinker; SP, sporadic; W, week; m, month; y, year; SD, Standard Deviation

**Table S2.** Chromosomal Instability (CIN) and True Diversity Index (TD) for Exposed (E) and Unexposed (UE) groups

| E  | CIN  |      |       |       |       |      | TD   |      |       |       |       |      |
|----|------|------|-------|-------|-------|------|------|------|-------|-------|-------|------|
|    | CEP2 | CEP3 | CEP11 | CEP15 | CEP17 | Mean | CEP2 | CEP3 | CEP11 | CEP15 | CEP17 | Mean |
| 1  | 10%  | 47%  | 12%   | 26%   | 78%   | 35%  | 1,48 | 3,06 | 1,52  | 2,03  | 7,1   | 3,04 |
| 2  | 48%  | 49%  | 54%   | 40%   | 58%   | 50%  | 3,26 | 3,12 | 2,82  | 2,56  | 3,55  | 3,06 |
| 3  | 10%  | 52%  | 30%   | 27%   | 10%   | 26%  | 1,48 | 3,27 | 1,84  | 2,15  | 1,47  | 2,04 |
| 4  | 44%  | 50%  | 31%   | 25%   | 74%   | 45%  | 3,44 | 3,34 | 2,37  | 2,07  | 6,01  | 3,45 |
| 5  | 42%  | 38%  | 41%   | 36%   | 40%   | 39%  | 2,82 | 2,96 | 2,47  | 2,36  | 3,37  | 2,79 |
| 6  | 35%  | 44%  | 51%   | 37%   | 31%   | 40%  | 2,77 | 3,14 | 2,31  | 2,31  | 2,48  | 2,61 |
| 7  | 34%  | 35%  | 51%   | 34%   | 29%   | 37%  | 2,77 | 2,53 | 2,18  | 2,45  | 2,38  | 2,46 |
| 8  | 23%  | 48%  | 45%   | 37%   | 27%   | 36%  | 2,02 | 3,29 | 2,37  | 2,19  | 2,42  | 2,46 |
| 9  | 27%  | 46%  | 49%   | 21%   | 19%   | 32%  | 2,28 | 2,87 | 2,23  | 1,95  | 1,91  | 2,25 |
| 10 | 29%  | 60%  | 51%   | 30%   | 27%   | 39%  | 2,59 | 3,53 | 2,31  | 2,23  | 2,36  | 2,60 |
| UE | CIN  |      |       |       |       |      | TD   |      |       |       |       |      |
|    | CEP2 | CEP3 | CEP11 | CEP15 | CEP17 | Mean | CEP2 | CEP3 | CEP11 | CEP15 | CEP17 | Mean |
| 1  | 18%  | 49%  | 21%   | 22%   | 15%   | 25%  | 1,81 | 3,29 | 1,92  | 2,0   | 1,58  | 2,12 |
| 2  | 17%  | 16%  | 20%   | 18%   | 31%   | 20%  | 1,67 | 1,67 | 1,76  | 1,71  | 2,45  | 1,85 |
| 3  | 18%  | 18%  | 19%   | 31%   | 21%   | 21%  | 1,87 | 1,81 | 1,89  | 2,09  | 1,8   | 1,89 |
| 4  | 13%  | 18%  | 18%   | 19%   | 27%   | 19%  | 1,65 | 1,81 | 1,71  | 1,73  | 2,32  | 1,84 |
| 5  | 17%  | 20%  | 30%   | 15%   | 24%   | 21%  | 1,82 | 1,98 | 1,98  | 1,58  | 1,97  | 1,87 |
| 6  | 16%  | 16%  | 22%   | 24%   | 26%   | 21%  | 1,78 | 1,78 | 1,84  | 1,89  | 1,98  | 1,85 |
| 7  | 8%   | 24%  | 15%   | 21%   | 17%   | 17%  | 1,39 | 2,06 | 1,52  | 1,98  | 1,82  | 1,75 |
| 8  | 9%   | 25%  | 18%   | 26%   | 30%   | 22%  | 1,43 | 1,97 | 1,61  | 2,04  | 2,83  | 1,97 |
| 9  | 9%   | 13%  | 11%   | 18%   | 22%   | 15%  | 1,47 | 1,64 | 1,48  | 1,66  | 2,06  | 1,66 |
| 10 | 10%  | 18%  | 12%   | 9%    | 32%   | 16%  | 1,48 | 1,66 | 1,52  | 1,35  | 2,15  | 1,63 |

**Abbreviations:** E, Exposed individuals; UE, Unexposed individuals; CEP2, centromeric probe for chromosome 2; CEP3, centromeric probe for chromosome 3; CEP11, centromeric probe for chromosome 11; CEP15, centromeric probe for chromosome 15; CEP17, centromeric probe for chromosome 17; CIN, Chromosomal Instability; TD, True Diversity index

## SUPPLEMENTARY FIGURE LEGEND

**Figure S1.** Multivariate analysis with Pearson correlation coefficient between clonal heterogeneity (CH) and clinicopathologic characteristics. Values greater than 0.5 are indicative of a statistically significant correlation. No correlation was found between CH with any of the variables studied: histotype (HT), tumor size (T), lymph nodes (N), lymphovascular invasion (LI), progesterone receptor (PR), HER2 and KI67.
