# Supplementary figures and images for: Chromosomal Damage, Chromosome Instability, and Polymorphisms in GSTP1 and XRCC1 as Biomarkers of Effect and Susceptibility in Farmers Exposed to Pesticides
Source: MDPI journal article supplement (doi:10.3390/ijms25084167), 2024-04-10

A

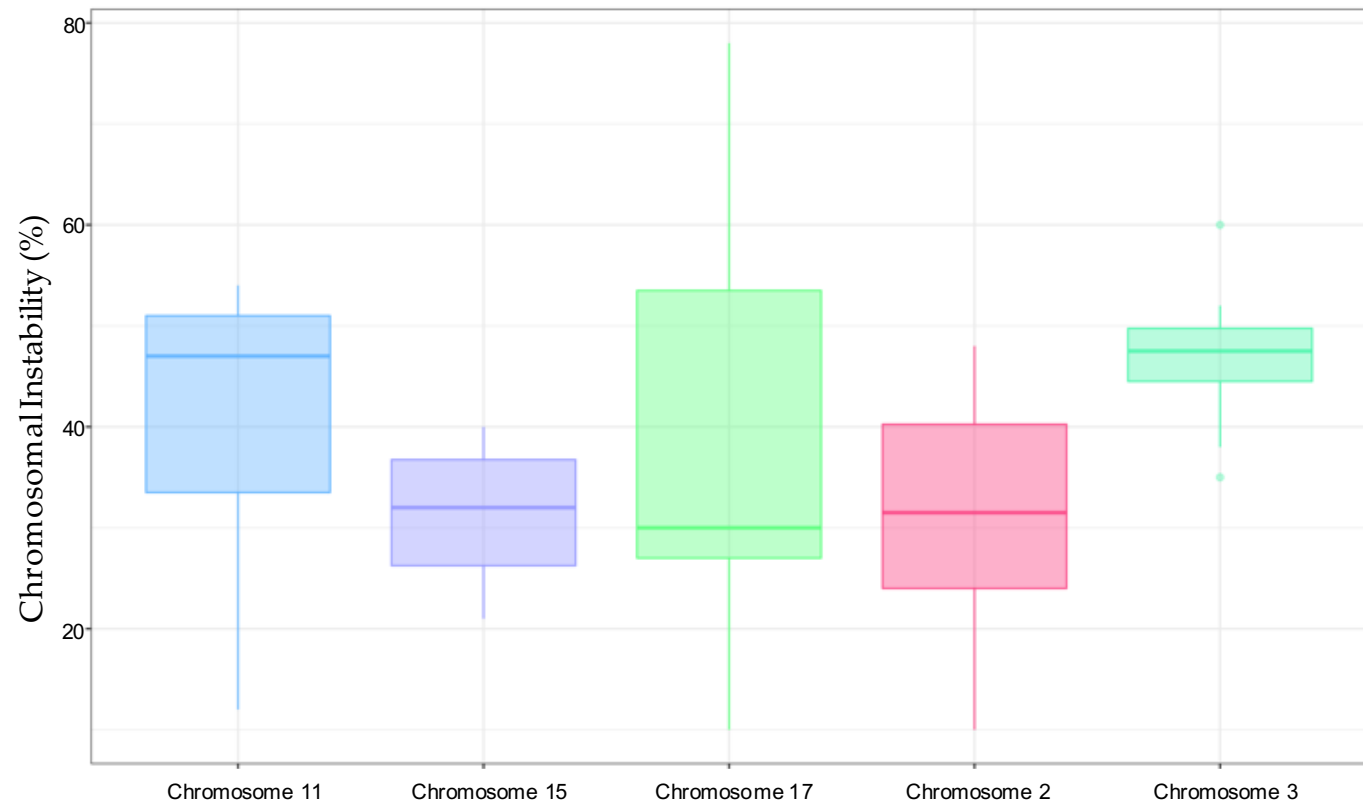

B

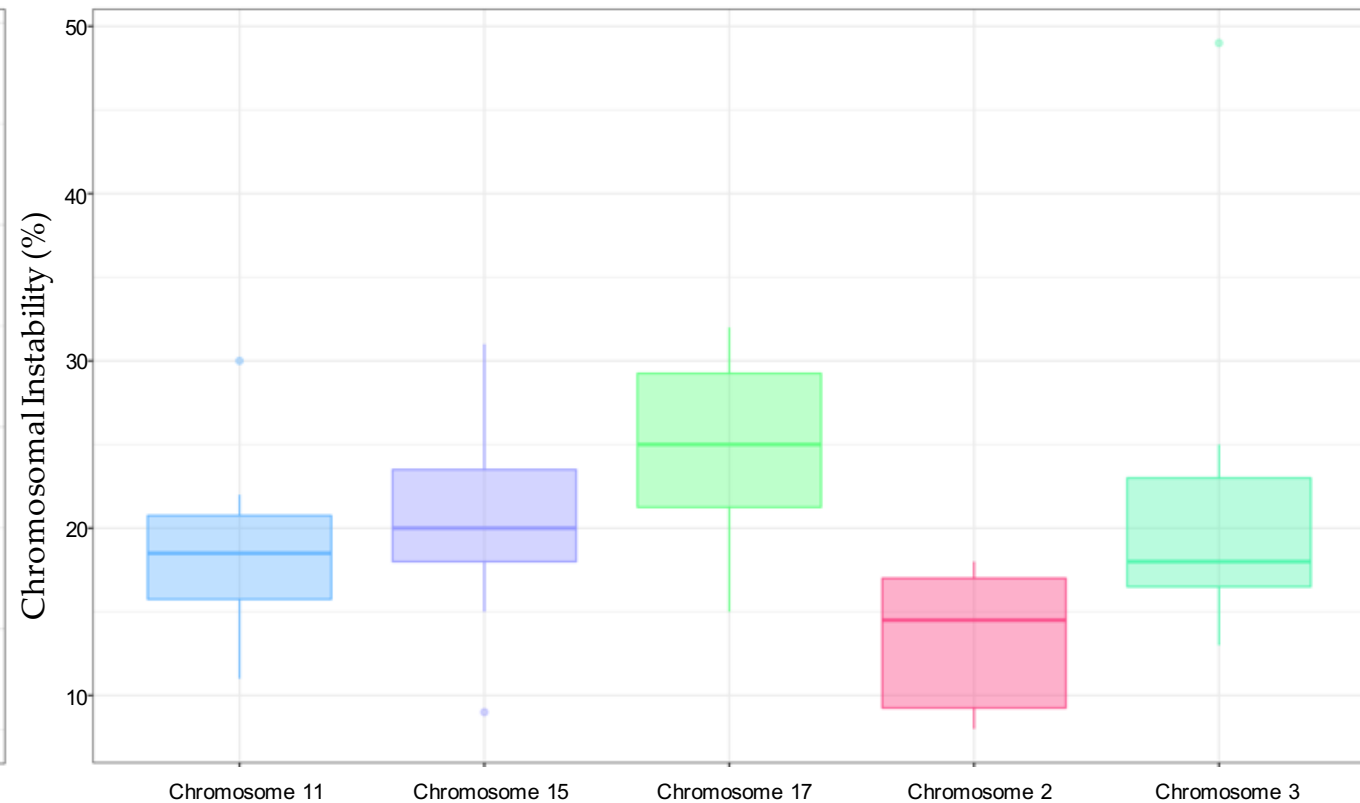

Supplement: s1 [file s1]
